# Supplementary material for: Division of Responsibility in Child Feeding and Eating Competence among Brazilian Caregivers
Source: MDPI journal article supplement (doi:10.3390/nu15092225), 2023-05-08
Supplement: s1 [file s1]

## Supplementary Files

**Table S1.** Sociodemographic characteristics of the individuals ( $n = 549$  - Brazil).

|                             |                  | Sample ( $n = 549$ ) |
|-----------------------------|------------------|----------------------|
|                             |                  | Freq (%)             |
| Caregiver's gender          | Female           | 487 (87.07%)         |
|                             | Male             | 62 (11.29%)          |
| Caregiver's age             | Up to 39 years   | 348 (63.39%)         |
|                             | 40 years or more | 201 (36.61%)         |
| Caregiver's schooling level | High School      | 28 (5.10%)           |
|                             | Undergraduate    | 135 (24.59%)         |
|                             | Graduate         | 386 (70.31%)         |
| Income *                    | Up to 3 MW       | 47 (8.56%)           |
|                             | 4 to 5 MW        | 46 (8.38%)           |
|                             | 6 to 9 MW        | 89 (16.21%)          |
|                             | 10 to 15 MW      | 146 (26.59%)         |
|                             | More than 15 MW  | 174 (31.69%)         |
| Child's gender              | Female           | 292 (53.19%)         |
|                             | Male             | 257 (46.81%)         |
| Child's age                 | 2 years          | 149 (27.14%)         |
|                             | 3 years          | 123 (22.40%)         |
|                             | 4 years          | 128 (23.32%)         |
|                             | 5 years          | 81 (14.75%)          |
|                             | 6 years          | 68 (12.39%)          |

\* 1 MW = BRL \$ 1212.00 (BRL: Brazilian Real is the official currency of Brazil and 1.00 USD = 5.24 BRL – February 28 2023).
